# Supplementary material for: Hollow CuO nanospheres uniformly anchored on porous Si nanowires: preparation and their potential use as electrochemical sensors
Source: Royal Society of Chemistry journal article supplement (doi:10.1039/c2nr32556j), 2012-01-01
Supplement: c2nr32556j.pdf [file c2nr32556j.pdf]

Supporting information of “**Hollow CuO Nanospheres Uniformly Anchored on Porous Si Nanowires: Preparation and Their Potential Use as Electrochemical sensors**”

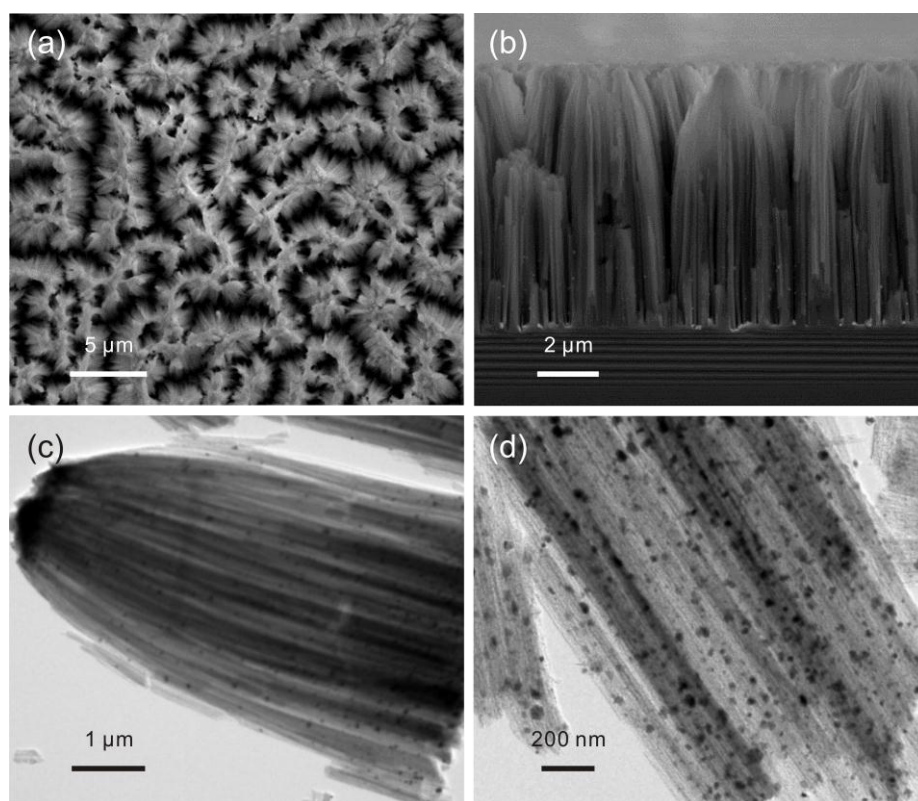

Figure S1. Cu nanoparticles anchored on porous Si nanowires. (a) and (b) SEM images of top and side view, respectively; (c) TEM image of individual bunch of porous Si nanowires and (d) High magnified TEM image.
